# Supplementary material for: The effects of fermented rye products on gut microbiota and their association with metabolic factors in Chinese adults – an explorative study
Source: Royal Society of Chemistry journal article supplement (doi:10.1039/d1fo01423d), 2021-01-01
Supplement: d1fo01423d1.pdf [file d1fo01423d1.pdf]

**Supplementary Table S1.** Macronutrient composition of the intervention foods.

| Nutrients (g/100g)         | Fermented rye bran products<br>(FRB) |       | Refined wheat products<br>(RW) |       |
|----------------------------|--------------------------------------|-------|--------------------------------|-------|
|                            | Crisp bread                          | Puffs | Crisp bread                    | Puffs |
| Fat                        | 1.9                                  | 3.4   | 2.7                            | 2.2   |
| Protein                    | 12.4                                 | 11.2  | 10.2                           | 12.2  |
| Dietary Fiber <sup>1</sup> | 22.0                                 | 23.2  | 5.8                            | 5.8   |
| Soluble Fiber              | 7.8                                  | 3.5   | 1.5                            | 2.7   |
| Insoluble Fiber            | 14.2                                 | 14.9  | 4.3                            | 3.1   |
| Carbohydrates              | 61                                   | 59.5  | 79.5                           | 78.3  |
| Ash                        | 2.6                                  | 2.6   | 1.8                            | 1.5   |

<sup>1</sup>Fiber content as analyzed by the Uppsala method with inclusion of fructans.

**Supplementary Table S2.** Blood lipids associated with fecal SCFAs among all participants (n = 84) at week 12.

| Lipids                      | SCFAs <sup>1</sup> (µg/mg) | β <sup>6</sup> | SE    | P-value |
|-----------------------------|----------------------------|----------------|-------|---------|
| TC <sup>2</sup> (mmol/L)    | Acetic acid                | 0.011          | 0.014 | 0.418   |
|                             | Propanoic acid             | 0.011          | 0.011 | 0.333   |
|                             | Butyric acid               | 0.005          | 0.007 | 0.522   |
|                             | Isobutyric acid            | 0.034          | 0.035 | 0.337   |
|                             | Isovaleric acid            | 0.021          | 0.023 | 0.367   |
|                             | 2-Methylbutyric acid       | 0.023          | 0.030 | 0.430   |
|                             | Valeri acid                | 0.006          | 0.020 | 0.743   |
|                             | Total SCFAs                | 0.004          | 0.004 | 0.225   |
| HDL-C <sup>3</sup> (mmol/L) | Acetic acid                | 0.015          | 0.014 | 0.277   |
|                             | Propanoic acid             | 0.055          | 0.049 | 0.261   |
|                             | Butyric acid               | -0.007         | 0.030 | 0.982   |
|                             | Isobutyric acid            | -0.249         | 0.184 | 0.176   |
|                             | Isovaleric acid            | -0.126         | 0.116 | 0.278   |
|                             | 2-Methylbutyric acid       | -0.169         | 0.148 | 0.261   |
|                             | Valeri acid                | -0.059         | 0.089 | 0.507   |
|                             | Total SCFAs                | 0.003          | 0.015 | 0.857   |
| LDL-C <sup>4</sup> (mmol/L) | Acetic acid                | 0.016          | 0.026 | 0.532   |
|                             | Propanoic acid             | 0.020          | 0.020 | 0.319   |
|                             | Butyric acid               | 0.009          | 0.013 | 0.478   |
|                             | Isobutyric acid            | 0.072          | 0.066 | 0.275   |
|                             | Isovaleric acid            | 0.040          | 0.043 | 0.352   |
|                             | 2-Methylbutyric acid       | 0.050          | 0.055 | 0.361   |
|                             | Valeri acid                | 0.015          | 0.037 | 0.693   |
|                             | Total SCFAs                | 0.008          | 0.007 | 0.214   |
| TG <sup>5</sup> (mmol/L)    | Acetic acid                | 0.110          | 0.169 | 0.514   |
|                             | Propanoic acid             | 0.131          | 0.093 | 0.159   |
|                             | Butyric acid               | 0.044          | 0.096 | 0.650   |
|                             | Isobutyric acid            | -0.499         | 0.526 | 0.342   |
|                             | Isovaleric acid            | -0.212         | 0.313 | 0.497   |
|                             | 2-Methylbutyric acid       | -0.369         | 0.402 | 0.358   |
|                             | Valeri acid                | -0.647         | 0.359 | 0.072   |
|                             | Total SCFAs                | 0.007          | 0.047 | 0.878   |

<sup>1</sup> SCFAs: short-chain fatty acids; <sup>2</sup>TC: total cholesterol; <sup>3</sup>HDL-C: high density lipoprotein cholesterol; <sup>4</sup>LDL-C: low density lipoprotein cholesterol; <sup>5</sup>TG: total triglycerides;

<sup>6</sup>β according to GENMOD (Generalized linear model) adjusted for sex, age and BMI in SAS.



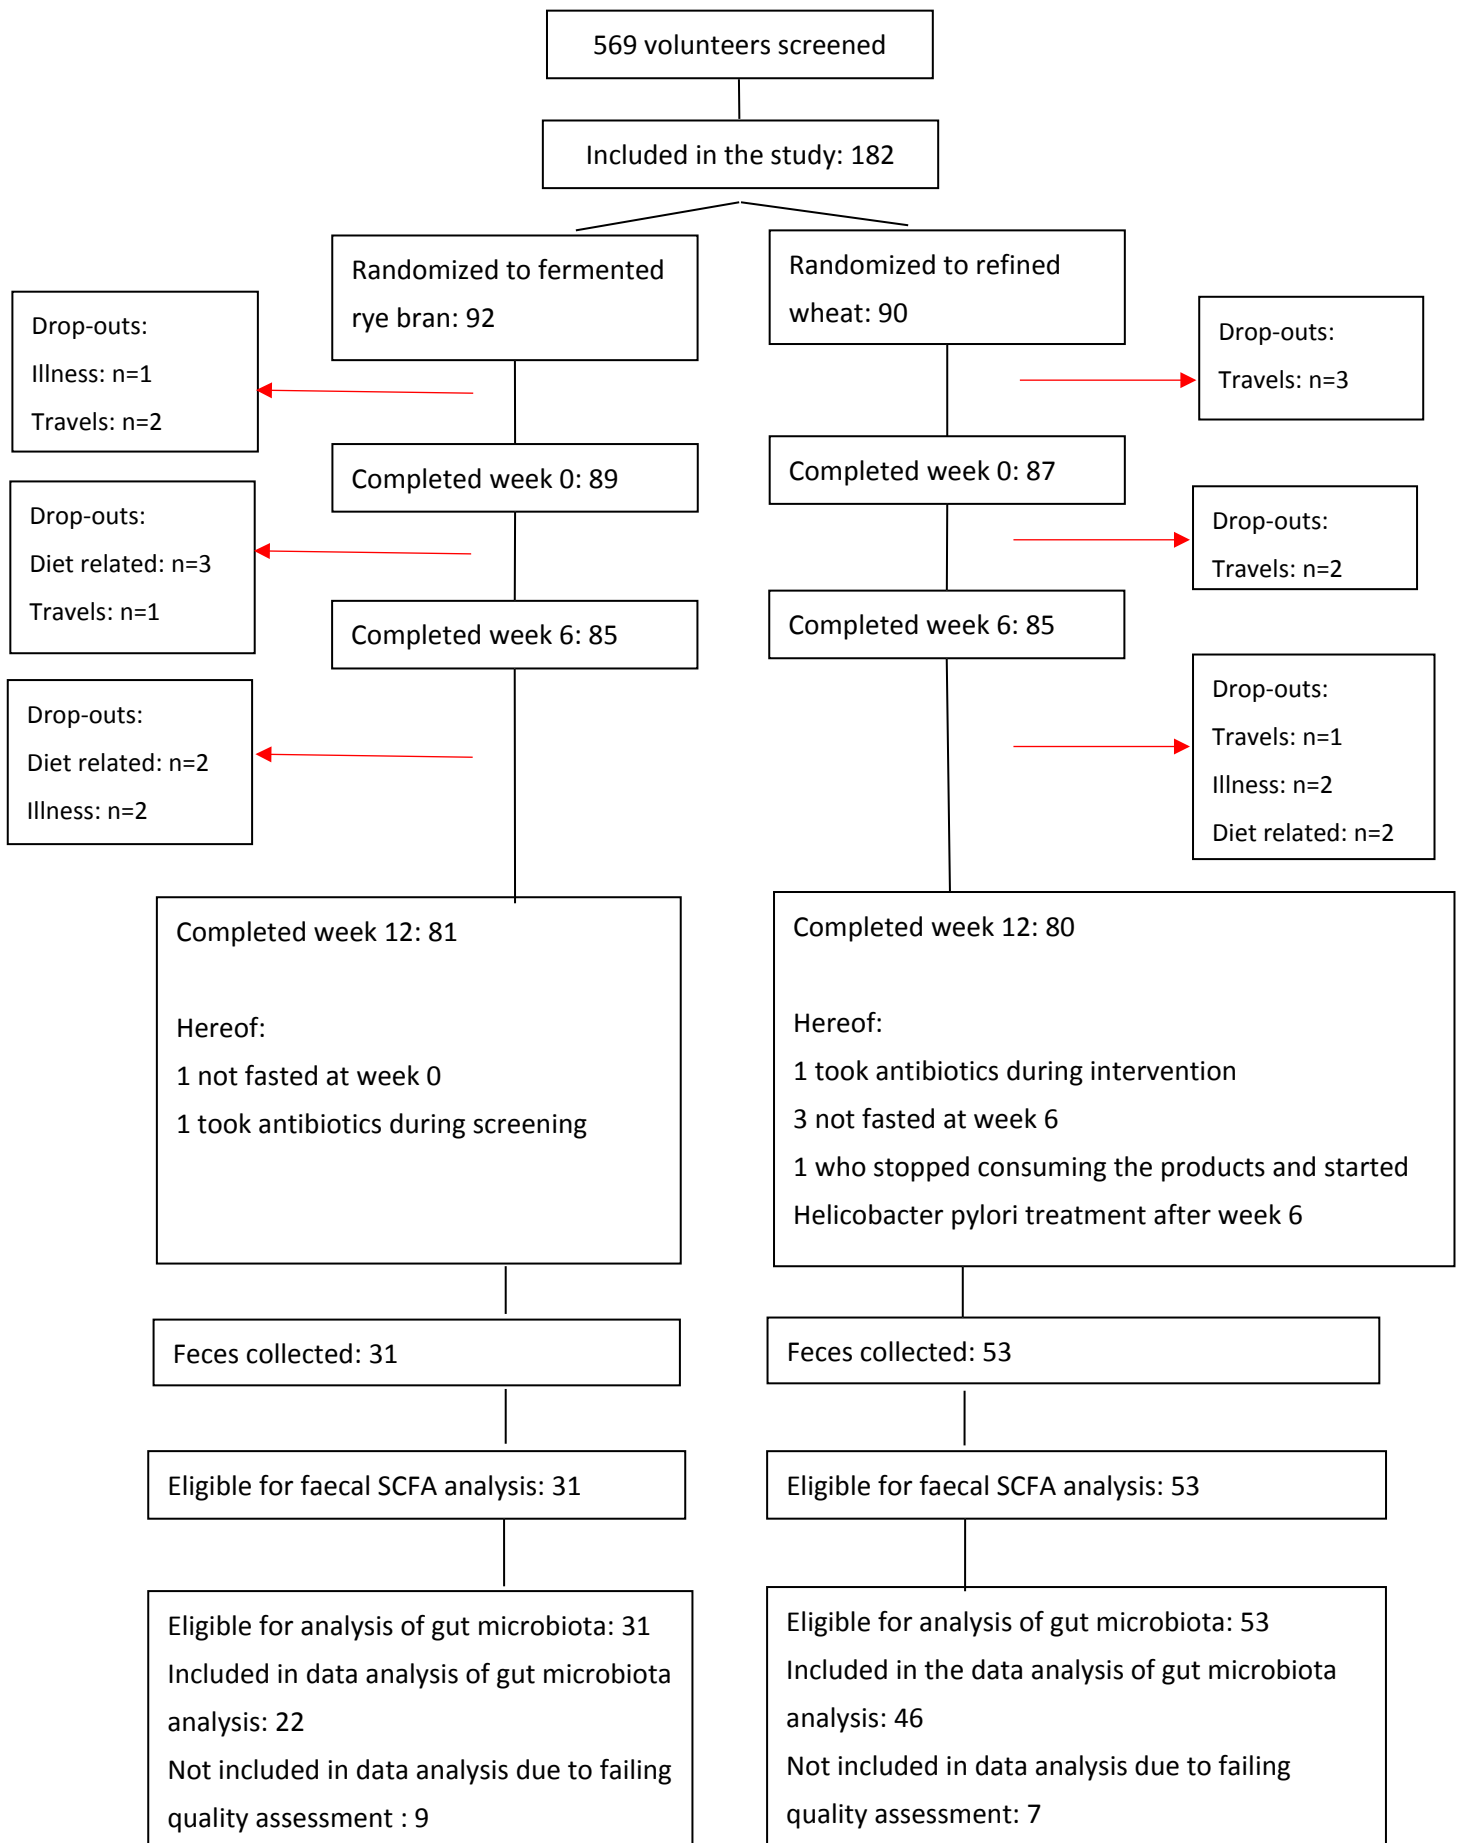

**Supplementary Figure S1.** Flow sheet of participant.

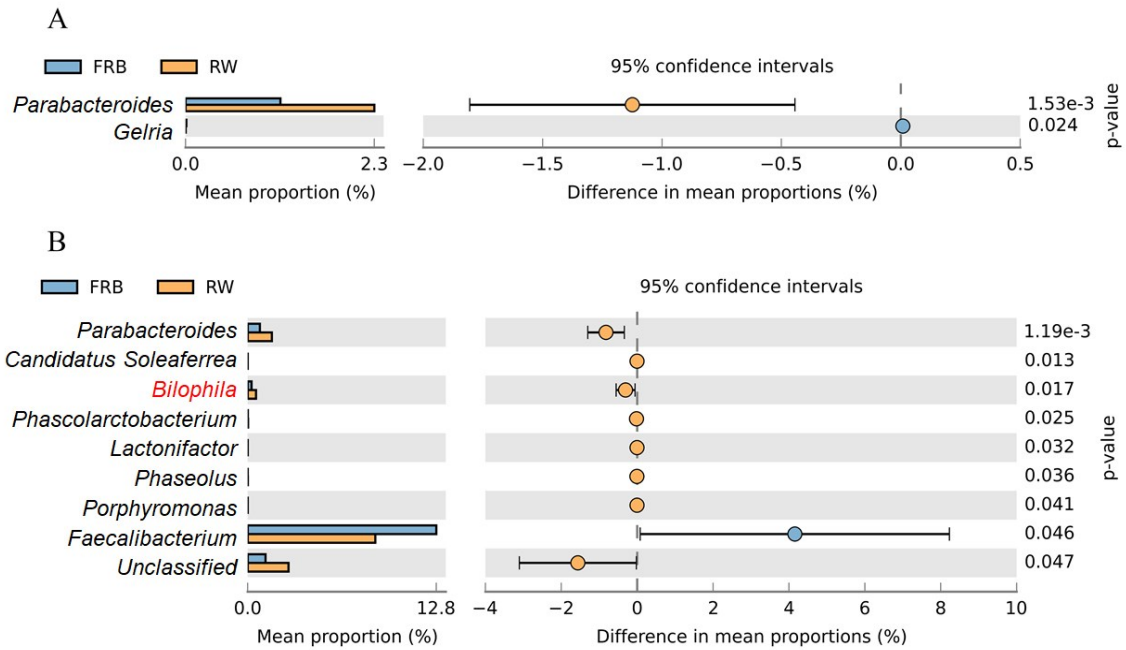

**Supplementary Figure S2.** Extended error bar plots illustrating mean proportions of the bacterial genera in FRB and RW groups at baseline (A) and week 12 (B). Taxa were ranked by respective *P*-values with 0.05 thresholds in STAMP. Circles represented the differences between the mean proportions of bacteria (the effect size), adjacent to their respective CI (error bars). Samples from FRB and RW groups were in blue and yellow, respectively. FRB: fermented rye bran; RW: refined wheat.
